# Supplementary material for: Neural Dynamics of Processing Inflectional Morphology: An fMRI Study on Korean Inflected Verbs
Source: Preprints.org preprint supplement (doi:10.20944/preprints202406.1890.v1), 2024-06-26
Supplement: Supplementary file 1 [file supplementary]

###### **Table S1.** Experimental conditions and statistical comparisons of sublexical and lexical variables.

| **Semantic ambiguity** | **Inflection  type** | **Word  Len** | **Word  Freq** | **Type**  **Freq** | **Token Freq** | **Fam** | **Obj  NOM** | **Subj NOM** | **Subj  ROM** | **Subj DOM** |
| --- | --- | --- | --- | --- | --- | --- | --- | --- | --- | --- |
| Control | Base | 2.4 (0.5) | 1.16 (0.51) | 3.1 (0.68) | 3.92 (0.76) | 6.24  (1.23) | 1 (0) | 1.21  (0.41) | - | - |
| Regular | 2.47 (0.51) | 1.12 (0.57) | 2.78 (0.69) | 3.61 (0.79) | 5.77  (1.48) | 1 (0) | 1.20  (0.43) | - | - |
| Irregular  inflection | 2.44 (0.51) | 1.29 (0.7) | 2.97 (1) | 3.7 (1.15) | 5.74  (1.57) | 1 (0) | 1.13  (0.42) | - | - |
| Homonym | Base | 2.35 (0.49) | 0.9 (0.52) | 3.14 (0.82) | 4.01 (0.92) | 6.24  (1.16) | 2.13 (0.63) | 1.48  (0.51) | 1.90  (1.49) | 1.58 (0.97) |
| Regular | 2.4 (0.5) | 1.11 (0.5) | 3.13 (0.61) | 3.87 (0.66) | 5.88  (1.41) | 2.25 (0.44) | 1.42  (0.54) | 1.92  (1.59) | 1.7 (0.91) |
| Irregular | 2.4 (0.5) | 1.14 (0.52) | 3.03 (0.78) | 3.8 (0.96) | 5.80  (1.36) | 2.55 (0.83) | 1.41  (0.50) | 1.85  (1.43) | 1.87 (0.88) |
| Statistics | | *n.s.*  *F* = 0.22,  *p* = .64 | *n.s.*  *F* = 0.22,  *p* = .47 | *n.s.*  *F* = 0.002,  *p* = .97 | *n.s.*  *F* = 0.04,  *p* = .85 | *n.s.*  *F* = 2.37,  *p* = .127 | *F* = 84.4,  *p* < .001 | *F* = 6.2,  *p* = .01 | *n.s.*  *F* = 0.22,  *p* = .641 | *n.s.*  *F* = 1.01, *p* = .319 |

*Note*. All frequency measures were log-transformed, per million occurrences in the given corpus.

Word Len = Word length in syllable; Stem Len = stem length in syllable; Word Freq = word frequency;

Type Freq = type frequency of the first syllable; Token Freq = token frequency of the first syllable;

Subj Fam = subjective word familiarity; Obj NOM = number of objective meanings;

Subj NOM = number of subjective meanings; Subj ROM = subjective relatedness of meanings;

Subj DOM = subjective meaning dominance.
